# Supplementary material for: Decoding the molecular, cellular, and functional heterogeneity of zebrafish intracardiac nervous system
Source: Springer Nature journal article supplement (doi:10.1038/s41467-024-54830-w), 2024-12-04
Supplement: MOESM1 [file 41467_2024_54830_MOESM1_ESM.pdf]

**Supplementary Information:**

**Decoding the molecular, cellular, and functional heterogeneity of zebrafish intracardiac nervous system**

Andrea Pedroni, Elanur Yilmaz, Lisa Del Vecchio, Prabesh Bhattarai, Inés Talaya Vidal, Yu-Wen E. Dai, Konstantinos Koutsogiannis, Caghan Kizil and Konstantinos Ampatzis

**Supplementary Figures: 7**

**Supplementary Tables: 2**

**Supplementary Figures:**

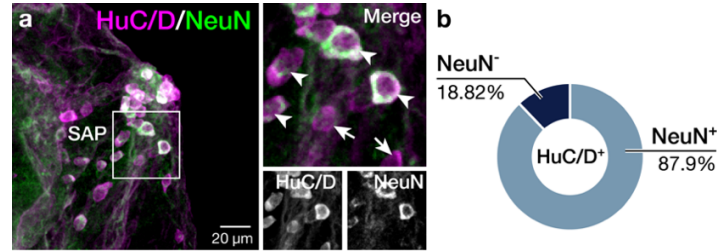

**Supplementary Figure 1. Expression pattern of NeuN in the adult zebrafish SAP.** **a.** Whole-mount photomicrographs showing the NeuN<sup>+</sup> (green) and HuC/D<sup>+</sup> (magenta) neuron somata in the SAP of the adult zebrafish heart. None of the neurons were found to be HuC/D<sup>+</sup>/NeuN<sup>+</sup>. Arrowheads indicate double-labeled neurons and arrows the HuC/D<sup>+</sup>/NeuN<sup>-</sup>. **b.** The proportion of the HuC/D expressing neurons that also express NeuN. HuC/D, *elav3+4*; NeuN, neuronal protein (Fox-3/Rbfox3).

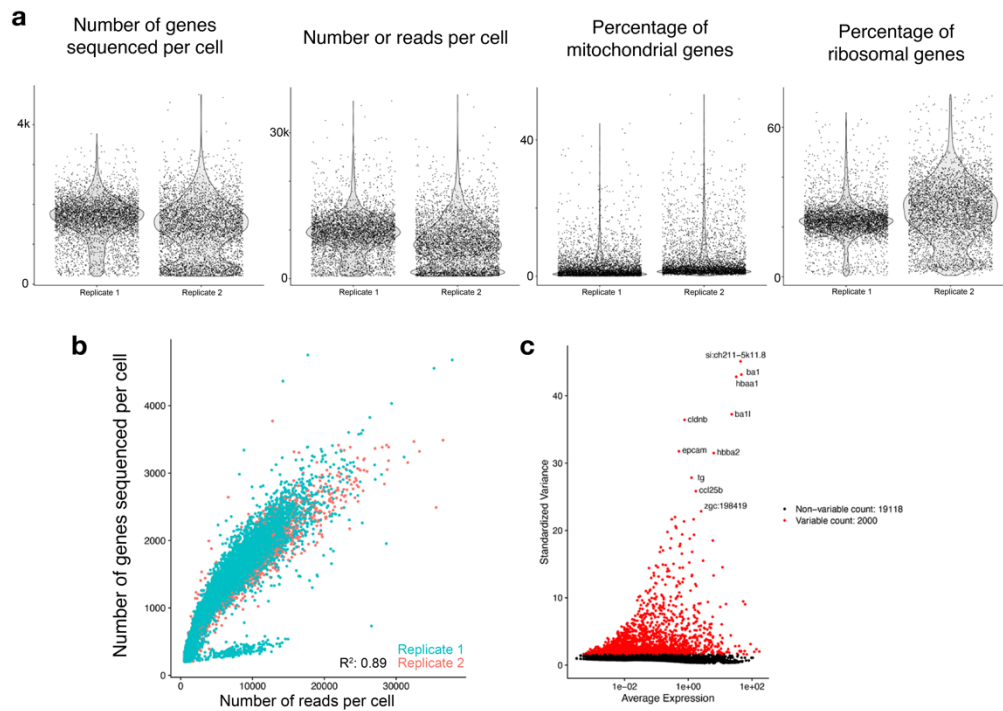

**Supplementary Figure 2. QC graphs for single-cell sequencing. a.** Violin plots for two single cell sequencing experiments (replicates). The number of genes sequenced per cell, number of reads per cell, and percentages of mitochondrial and ribosomal genes are shown. **b.** Distribution graph for the number of genes sequenced per cell and number of reads per cell. R<sup>2</sup>: correlation coefficient. **c.** Volcano plot for the most variable genes in the entire dataset (red).



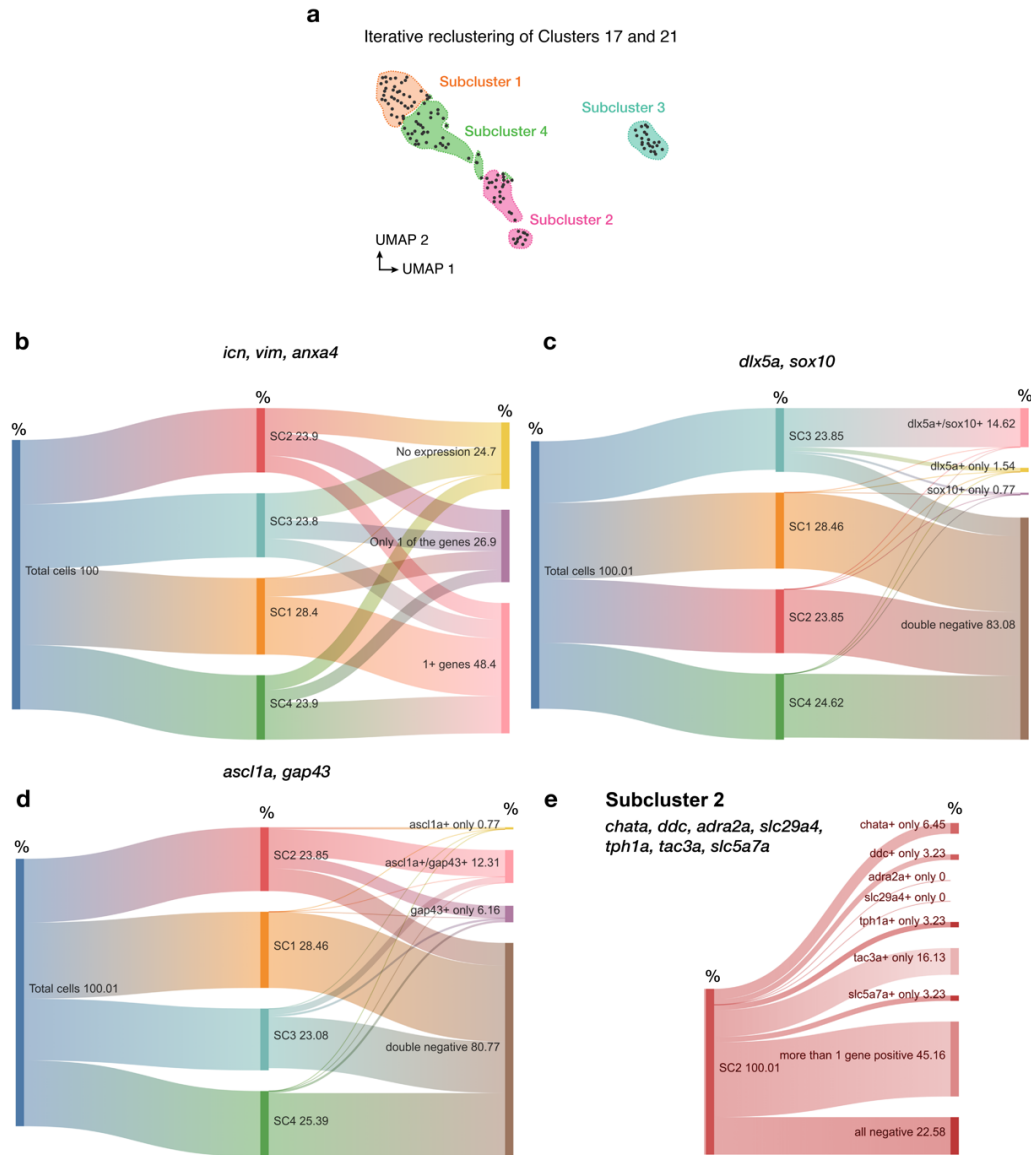

**Supplementary Figure 4. Sankey diagrams for iteratively re-clustered nervous system-related cells.** **a.** Reclustering of Clusters 17 and 21 resulted in 4 Subclusters (SCs). **b.** Cells analyzed regarding the expression of *icn*, *vim* and *anxa4*, ectodermal-epithelial markers. Most cells in Subclusters 1 and 4 express at least 1 of these neuroepithelial cells (100% of SC 1, 77.4% of SC 4). Subclusters 1 and 4 are the most representative of neuroepithelial signatures. **c.** Cells analyzed in regard to expression of *sox10* and *dlx5a*, Schwann cell markers. 71% of the cells in Subcluster 3 express at least 1 of these Schwann cell markers. Subcluster 3 represents Schwann cell signatures. **d.** Cells analyzed concerning the expression of *ascl1a* and *gap43*, neuronal markers. 64.5% of the cells in Subcluster 2 express at least 1 of these neuronal markers. Subcluster 2 represents neuronal cell signatures. **e.** As per expression of different neuronal subtype markers such as *chata*, *ddc*, *adra2a*, *slc29a4*, *tph1a*, *tac3a*, and *slc5a7a*, Subcluster 2 contains cholinergic, adrenergic, catecholaminergic, serotonergic, glutamatergic, and GABAergic neuronal types. 45.2% of Subcluster 2 expressed more than 1 of these genes, suggesting multiple neurotransmitter responsiveness.

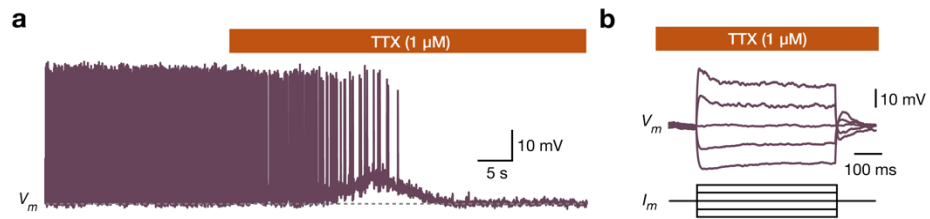

**Supplementary Figure 5. SAP neurons release sodium-based action potentials. a-b.** Voltage-clamp ramp recordings show that application of Na<sup>+</sup> channel blocker tetrodotoxin (TTX) eliminates the firing (action potentials) of SAP neurons (example from Bursting neuron, B), preserving the electrical properties (SAG and AHP rebound). TTX, tetrodotoxin.

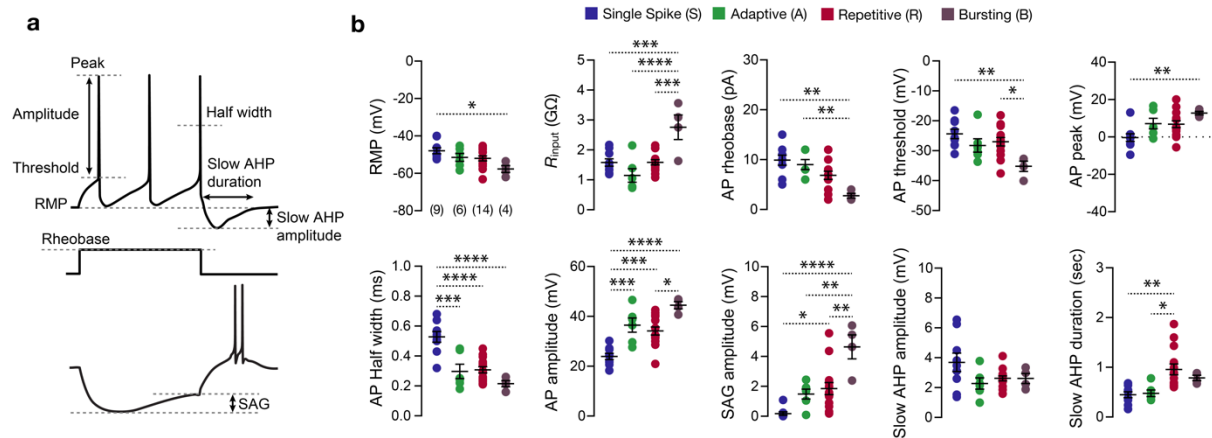

**Supplementary Figure 6. Detailed physiological features of the adult zebrafish SAP neurons.**

**a.** Schematic presentation of the measured electrical properties of the SAP neurons. **b.** Detailed analysis of the cellular and electrical properties of the SAP neurons in the adult zebrafish heart. AHP, after hyperpolarization potential; AP, action potential;  $R_{in}$ , input resistance; RMP, resting membrane potential. Data are presented as mean $\pm$ SEM. \* $P < 0.05$ ; \*\* $P < 0.01$ ; \*\*\* $P < 0.001$ ; \*\*\*\* $P < 0.0001$ . For detailed statistics, see Supplementary Table 1. Source data are provided as a Source Data file.

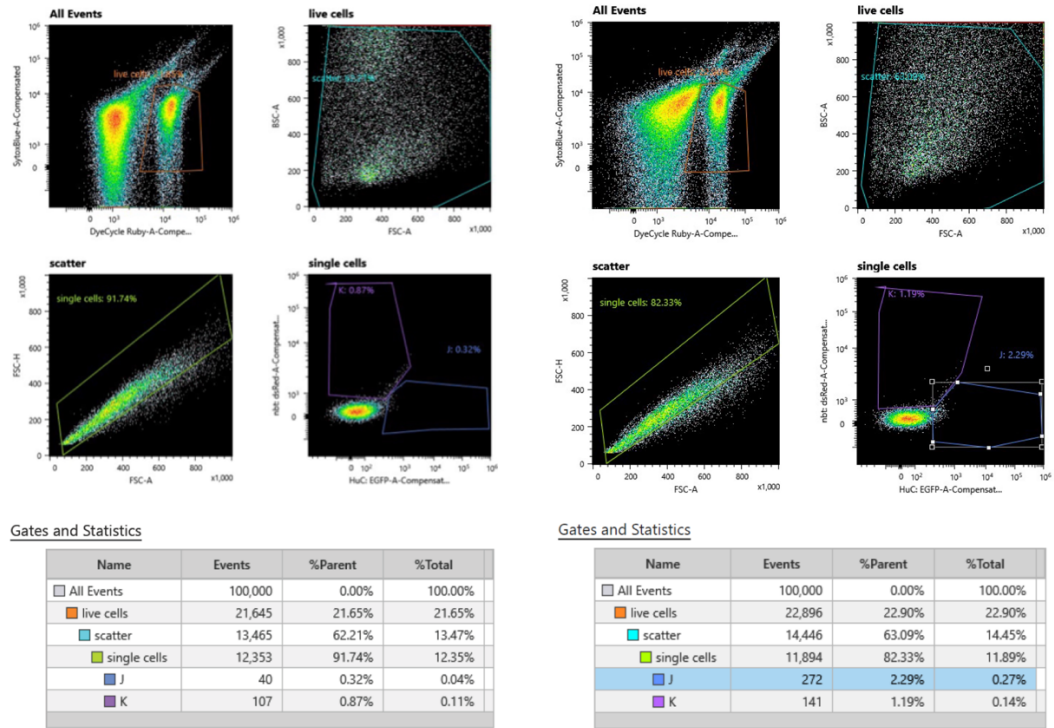

**Supplementary Figure 7. Gating strategy for sorting GFP and DsRed-positive single cells.** Plots demonstrate the gating strategy from WT-AB to separate GFP<sup>+</sup> and DsRed<sup>+</sup> cells (<1% of total cells) from negative cells (left panel) and sorting viable GFP<sup>+</sup> (approximately 2% of total cells in J-gating in single cells plot) and DsRed<sup>+</sup> (roughly 1% of total cells in K-gating in single cells plot) from transgenic *Tg(HuC:GFP)* and *Tg(nbt:dsRED)* lines (right panel). These lines were used to capture all possible neuronal populations in the heart. Rare cell populations sorted from J- and K-gatings were collected and pooled in a collection tube and processed for scRNA sequencing analysis.



**Supplementary Table 1. Detailed statistics**

| Figure                     | Statistics              | Result                                                                                                                                                                                                                                                                              | Post-hoc Test | comparison                         | Significance | P-value                          |
|----------------------------|-------------------------|-------------------------------------------------------------------------------------------------------------------------------------------------------------------------------------------------------------------------------------------------------------------------------------|---------------|------------------------------------|--------------|----------------------------------|
| Main figures               |                         |                                                                                                                                                                                                                                                                                     |               |                                    |              |                                  |
| 1d                         | Descriptive             | SAP ( <i>n</i> = 488 neurons): 39.79 ± 0.83<br>AVP ( <i>n</i> = 75 neurons): 30.1 ± 1.61<br>VBAP ( <i>n</i> = 33 neurons): 62.50 ± 2.06<br>BA wall ( <i>n</i> = 18 neurons): 72.71 ± 2.26<br>Ventricle wall ( <i>n</i> = 24 neurons): 77.65 ± 2.06                                  |               |                                    |              |                                  |
| 1e                         | Descriptive             | SAP neurons ( <i>n</i> = 23 zebrafish): 81.04 ± 3.63                                                                                                                                                                                                                                |               |                                    |              |                                  |
| 1f                         | Linear regression       | R <sup>2</sup> = 0.001<br>Sy.x = 16.28<br>Equation: Y= 2.696*X + 37.28<br><i>n</i> = 239 neurons                                                                                                                                                                                    |               |                                    |              |                                  |
| 3c<br>Soma sizes           | Unpaired <i>t</i> -test | t = 5.13, df = 206 (Two-tailed)                                                                                                                                                                                                                                                     |               | ChAT+<br>ChAT-                     | ****         | <i>P</i> < 0.0001                |
|                            | Descriptive             | ChAT+ ( <i>n</i> = 119 neurons): 45.47 ± 1.56<br>ChAT- ( <i>n</i> = 89 neurons): 35.15 ± 1.00                                                                                                                                                                                       |               |                                    |              |                                  |
| 3i<br>Proportion           | Descriptive             | Cholinergic ( <i>n</i> = 16 zebrafish): 80.96 ± 0.99<br>Glutamatergic ( <i>n</i> = 9 zebrafish): 8.26 ± 0.44<br>GABAergic ( <i>n</i> = 6 zebrafish): 6.41 ± 0.34<br>Serotonergic ( <i>n</i> = 6 zebrafish): 5.05 ± 0.39<br>Catecholaminergic ( <i>n</i> = 7 zebrafish): 4.58 ± 0.29 |               |                                    |              |                                  |
| 3i<br>Soma size            | One-way ANOVA           | <i>F</i> <sub>(4, 203)</sub> = 7.259<br><i>P</i> < 0.0001                                                                                                                                                                                                                           | Tukey's test  | Cholinergic<br>Glutamatergic       | **           | <i>P</i> <sub>adj</sub> = 0.0035 |
|                            |                         |                                                                                                                                                                                                                                                                                     |               | Cholinergic<br>GABAergic           | ***          | <i>P</i> <sub>adj</sub> = 0.0002 |
|                            |                         |                                                                                                                                                                                                                                                                                     |               | Cholinergic<br>Serotonergic        | ns           | <i>P</i> <sub>adj</sub> = 0.1205 |
|                            |                         |                                                                                                                                                                                                                                                                                     |               | Cholinergic<br>Catecholaminergic   | ns           | <i>P</i> <sub>adj</sub> = 0.5108 |
|                            |                         |                                                                                                                                                                                                                                                                                     |               | Glutamatergic<br>GABAergic         | ns           | <i>P</i> <sub>adj</sub> = 0.7493 |
|                            |                         |                                                                                                                                                                                                                                                                                     |               | Glutamatergic<br>Serotonergic      | ns           | <i>P</i> <sub>adj</sub> > 0.9999 |
|                            |                         |                                                                                                                                                                                                                                                                                     |               | Glutamatergic<br>Catecholaminergic | ns           | <i>P</i> <sub>adj</sub> = 0.9554 |
|                            |                         |                                                                                                                                                                                                                                                                                     |               | GABAergic<br>Serotonergic          | ns           | <i>P</i> <sub>adj</sub> = 0.9258 |
|                            |                         |                                                                                                                                                                                                                                                                                     |               | GABAergic<br>Catecholaminergic     | ns           | <i>P</i> <sub>adj</sub> = 0.5114 |
|                            |                         |                                                                                                                                                                                                                                                                                     |               | Serotonergic<br>Catecholaminergic  | ns           | <i>P</i> <sub>adj</sub> = 0.9652 |
|                            | Descriptive             | Cholinergic ( <i>n</i> = 119 neurons): 45.47 ± 1.56<br>Glutamatergic ( <i>n</i> = 39 neurons): 35.9 ± 1.17<br>GABAergic ( <i>n</i> = 23 neurons): 31.36 ± 2.4<br>Serotonergic ( <i>n</i> = 13 neurons): 35.42 ± 1.84<br>Catecholaminergic ( <i>n</i> = 14 neurons): 39.05 ± 3.19    |               |                                    |              |                                  |
| 4c<br>Firing %             | Descriptive             | Single Spike (S): <i>n</i> = 9 neurons<br>Adaptive (A): <i>n</i> = 6 neurons<br>Repetitive (R): <i>n</i> = 14 neurons<br>Bursting (B): <i>n</i> = 4 neurons                                                                                                                         |               |                                    |              |                                  |
| 4e<br>Spontaneous firing % | Descriptive             | Single Spike (S): <i>n</i> = 0 out of 9 neurons<br>Adaptive (A): <i>n</i> = 2 out of 6 neurons<br>Repetitive (R): <i>n</i> = 9 out of 14 neurons<br>Bursting (B): <i>n</i> = 4 out of 4 neurons                                                                                     |               |                                    |              |                                  |
| 4e<br>Firing frequency     | One-way ANOVA           | <i>F</i> <sub>(3, 29)</sub> = 110.3<br><i>P</i> < 0.0001                                                                                                                                                                                                                            | Tukey's test  | Single Spike (S)<br>Adaptive (A)   | ns           | <i>P</i> <sub>adj</sub> = 0.9593 |
|                            |                         |                                                                                                                                                                                                                                                                                     |               | Single Spike (S)<br>Repetitive (R) | *            | <i>P</i> <sub>adj</sub> = 0.0127 |
|                            |                         |                                                                                                                                                                                                                                                                                     |               | Single Spike (S)<br>Bursting (B)   | ****         | <i>P</i> <sub>adj</sub> < 0.0001 |
|                            |                         |                                                                                                                                                                                                                                                                                     |               | Adaptive (A)<br>Repetitive (R)     | ns           | <i>P</i> <sub>adj</sub> = 0.1078 |

|                           |                    |                                                                                                                                                                                                                        |                                 |                                    |      |                    |
|---------------------------|--------------------|------------------------------------------------------------------------------------------------------------------------------------------------------------------------------------------------------------------------|---------------------------------|------------------------------------|------|--------------------|
|                           |                    |                                                                                                                                                                                                                        |                                 | Adaptive (A)<br>Bursting (B)       | **** | $P_{adj} < 0.0001$ |
|                           |                    |                                                                                                                                                                                                                        |                                 | Repetitive (R)<br>Bursting (B)     | **** | $P_{adj} < 0.0001$ |
|                           | Descriptive        | Single Spike (S) ( $n = 9$ neurons): $0.0 \pm 0.0$<br>Adaptive (A) ( $n = 6$ neurons): $0.12 \pm 0.1$<br>Repetitive (R) ( $n = 14$ neurons): $0.64 \pm 0.15$<br>Bursting (B) ( $n = 4$ neurons): $4.7 \pm 0.32$        |                                 |                                    |      |                    |
| 4f<br>EPSC frequency      | One-way ANOVA      | $F_{(3, 15)} = 0.5344$                                                                                                                                                                                                 |                                 |                                    | ns   | $P = 0.6657$       |
|                           | Descriptive        | Single Spike (S) ( $n = 5$ neurons): $1.32 \pm 0.25$<br>Adaptive (A) ( $n = 5$ neurons): $0.98 \pm 0.12$<br>Repetitive (R) ( $n = 6$ neurons): $1.28 \pm 0.2$<br>Bursting (B) ( $n = 3$ neurons): $1.13 \pm 0.26$      |                                 |                                    |      |                    |
| 4f<br>Mean EPSC amplitude | One-way ANOVA      | $F_{(3, 15)} = 1.138$                                                                                                                                                                                                  |                                 |                                    | ns   | $P = 0.3655$       |
|                           | Descriptive        | Single Spike (S) ( $n = 5$ neurons): $21.11 \pm 0.68$<br>Adaptive (A) ( $n = 5$ neurons): $21.83 \pm 1.72$<br>Repetitive (R) ( $n = 6$ neurons): $20.23 \pm 1.07$<br>Bursting (B) ( $n = 3$ neurons): $24.26 \pm 2.75$ |                                 |                                    |      |                    |
| 4f<br>EPSC amplitude      | One-way ANOVA      | $F_{(3, 536)} = 1.406$                                                                                                                                                                                                 |                                 |                                    | ns   | $P = 0.2402$       |
|                           | Descriptive        | Single Spike (S) ( $n = 143$ EPSCs): $21.08 \pm 1.41$<br>Adaptive (A) ( $n = 133$ EPSCs): $21.97 \pm 1.58$<br>Repetitive (R) ( $n = 167$ EPSCs): $20.26 \pm 1.18$<br>Bursting (B) ( $n = 97$ EPSCs): $24.74 \pm 2.14$  |                                 |                                    |      |                    |
| 5c                        | Unpaired $t$ -test | $t = 0.687$ , $df = 28$ (Two-tailed)                                                                                                                                                                                   | <i>Ex-vivo</i><br>Cardiomyocyte |                                    | ns   | $P = 0.4974$       |
|                           | Descriptive        | <i>Ex-vivo</i> freq. ( $n = 16$ hearts): $2.88 \pm 0.11$<br>Cardiomyocyte freq. ( $n = 14$ cells): $2.75 \pm 0.14$                                                                                                     |                                 |                                    |      |                    |
| 5d                        | Paired $t$ -test   | $t = 15.97$ , $df = 5$ (Two-tailed)                                                                                                                                                                                    | Before sucrose<br>After sucrose |                                    | **** | $P < 0.0001$       |
|                           | Descriptive        | Before sucrose ( $n = 6$ neurons): $1.07 \pm 0.06$<br>After sucrose ( $n = 6$ neurons): $31.83 \pm 1.88$                                                                                                               |                                 |                                    |      |                    |
| 5e                        | Paired $t$ -test   | $t = 19.04$ , $df = 6$ (Two-tailed)                                                                                                                                                                                    | Before sucrose<br>After sucrose |                                    | **** | $P < 0.0001$       |
|                           | Descriptive        | Before sucrose ( $n = 7$ cardiomyocytes): $2.94 \pm 0.09$<br>After sucrose ( $n = 7$ cardiomyocytes): $0.31 \pm 0.13$                                                                                                  |                                 |                                    |      |                    |
| 5g                        | Paired $t$ -test   | $t = 10.79$ , $df = 4$ (Two-tailed)                                                                                                                                                                                    | Before sucrose<br>After sucrose |                                    | ***  | $P = 0.0004$       |
|                           | Descriptive        | Before sucrose ( $n = 5$ hearts): $3.16 \pm 0.1$<br>After sucrose ( $n = 5$ hearts): $2.87 \pm 0.09$                                                                                                                   |                                 |                                    |      |                    |
| 5h                        | Unpaired $t$ -test | $t = 1.971$ , $df = 21$ (Two-tailed)                                                                                                                                                                                   | Control<br>Reduced              |                                    | ns   | $P = 0.0620$       |
|                           | Descriptive        | Control ( $n = 11$ hearts): $3.11 \pm 0.1$<br>Reduced ( $n = 12$ hearts): $2.73 \pm 0.15$                                                                                                                              |                                 |                                    |      |                    |
| 5i                        | Paired $t$ -test   | $t = 2.564$ , $df = 5$ (Two-tailed)                                                                                                                                                                                    | Before sucrose<br>After sucrose |                                    | ns   | $P = 0.0504$       |
|                           | Descriptive        | Before sucrose ( $n = 6$ hearts): $2.88 \pm 0.09$<br>After sucrose ( $n = 6$ hearts): $2.7 \pm 0.03$                                                                                                                   |                                 |                                    |      |                    |
| Supplementary figures     |                    |                                                                                                                                                                                                                        |                                 |                                    |      |                    |
| Supplementary 6<br>RMP    | One-way ANOVA      | $F_{(3, 29)} = 3.836$<br>$P = 0.0199$                                                                                                                                                                                  | Tukey's test                    | Single Spike (S)<br>Adaptive (A)   | ns   | $P_{adj} = 0.5243$ |
|                           |                    |                                                                                                                                                                                                                        |                                 | Single Spike (S)<br>Repetitive (R) | ns   | $P_{adj} = 0.2298$ |
|                           |                    |                                                                                                                                                                                                                        |                                 | Single Spike (S)<br>Bursting (B)   | *    | $P_{adj} = 0.0116$ |
|                           |                    |                                                                                                                                                                                                                        |                                 | Adaptive (A)<br>Repetitive (R)     | ns   | $P_{adj} = 0.9960$ |
|                           |                    |                                                                                                                                                                                                                        |                                 | Adaptive (A)<br>Bursting (B)       | ns   | $P_{adj} = 0.2143$ |
|                           |                    |                                                                                                                                                                                                                        |                                 | Repetitive (R)<br>Bursting (B)     | ns   | $P_{adj} = 0.1847$ |
|                           | Descriptive        | Single Spike (S) ( $n = 9$ neurons): $-47.96 \pm 1.59$<br>Adaptive (A) ( $n = 6$ neurons): $-51.47 \pm 2.1$                                                                                                            |                                 |                                    |      |                    |

|                                                 |                  |                                                                                                                                                                                                                             |              |                                    |      |                    |
|-------------------------------------------------|------------------|-----------------------------------------------------------------------------------------------------------------------------------------------------------------------------------------------------------------------------|--------------|------------------------------------|------|--------------------|
|                                                 |                  | Repetitive (R) ( $n = 14$ neurons): $-52.0 \pm 1.33$<br>Bursting (B) ( $n = 4$ neurons): $-57.7 \pm 1.82$                                                                                                                   |              |                                    |      |                    |
| Supplementary<br>6<br>Rinput                    | One-way<br>ANOVA | $F_{(3, 29)} = 10.54$<br>$P < 0.0001$                                                                                                                                                                                       | Tukey's test | Single Spike (S)<br>Adaptive (A)   | ns   | $P_{adj} = 0.2857$ |
|                                                 |                  |                                                                                                                                                                                                                             |              | Single Spike (S)<br>Repetitive (R) | ns   | $P_{adj} > 0.9999$ |
|                                                 |                  |                                                                                                                                                                                                                             |              | Single Spike (S)<br>Bursting (B)   | ***  | $P_{adj} = 0.0009$ |
|                                                 |                  |                                                                                                                                                                                                                             |              | Adaptive (A)<br>Repetitive (R)     | ns   | $P_{adj} = 0.2138$ |
|                                                 |                  |                                                                                                                                                                                                                             |              | Adaptive (A)<br>Bursting (B)       | **** | $P_{adj} < 0.0001$ |
|                                                 |                  |                                                                                                                                                                                                                             |              | Repetitive (R)<br>Bursting (B)     | ***  | $P_{adj} = 0.0005$ |
|                                                 | Descriptive      | Single Spike (S) ( $n = 9$ neurons): $1.58 \pm 0.12$<br>Adaptive (A) ( $n = 6$ neurons): $1.14 \pm 0.22$<br>Repetitive (R) ( $n = 14$ neurons): $1.58 \pm 0.08$<br>Bursting (B) ( $n = 4$ neurons): $2.75 \pm 0.41$         |              |                                    |      |                    |
| Supplementary<br>6<br>Rheobase                  | One-way<br>ANOVA | $F_{(3, 29)} = 6.773$<br>$P = 0.0013$                                                                                                                                                                                       | Tukey's test | Single Spike (S)<br>Adaptive (A)   | ns   | $P_{adj} = 0.9313$ |
|                                                 |                  |                                                                                                                                                                                                                             |              | Single Spike (S)<br>Repetitive (R) | ns   | $P_{adj} = 0.0772$ |
|                                                 |                  |                                                                                                                                                                                                                             |              | Single Spike (S)<br>Bursting (B)   | **   | $P_{adj} = 0.0012$ |
|                                                 |                  |                                                                                                                                                                                                                             |              | Adaptive (A)<br>Repetitive (R)     | ns   | $P_{adj} = 0.4155$ |
|                                                 |                  |                                                                                                                                                                                                                             |              | Adaptive (A)<br>Bursting (B)       | **   | $P_{adj} = 0.0091$ |
|                                                 |                  |                                                                                                                                                                                                                             |              | Repetitive (R)<br>Bursting (B)     | ns   | $P_{adj} = 0.0690$ |
|                                                 | Descriptive      | Single Spike (S) ( $n = 9$ neurons): $9.88 \pm 1.0$<br>Adaptive (A) ( $n = 6$ neurons): $9.0 \pm 1.0$<br>Repetitive (R) ( $n = 14$ neurons): $6.85 \pm 0.82$<br>Bursting (B) ( $n = 4$ neurons): $2.75 \pm 0.47$            |              |                                    |      |                    |
| Supplementary<br>6<br>AP threshold              | One-way<br>ANOVA | $F_{(3, 29)} = 4.411$<br>$P = 0.0113$                                                                                                                                                                                       | Tukey's test | Single Spike (S)<br>Adaptive (A)   | ns   | $P_{adj} = 0.4702$ |
|                                                 |                  |                                                                                                                                                                                                                             |              | Single Spike (S)<br>Repetitive (R) | ns   | $P_{adj} = 0.6210$ |
|                                                 |                  |                                                                                                                                                                                                                             |              | Single Spike (S)<br>Bursting (B)   | **   | $P_{adj} = 0.0062$ |
|                                                 |                  |                                                                                                                                                                                                                             |              | Adaptive (A)<br>Repetitive (R)     | ns   | $P_{adj} = 0.9542$ |
|                                                 |                  |                                                                                                                                                                                                                             |              | Adaptive (A)<br>Bursting (B)       | ns   | $P_{adj} = 0.1615$ |
|                                                 |                  |                                                                                                                                                                                                                             |              | Repetitive (R)<br>Bursting (B)     | *    | $P_{adj} = 0.0342$ |
|                                                 | Descriptive      | Single Spike (S) ( $n = 9$ neurons): $-24.38 \pm 1.57$<br>Adaptive (A) ( $n = 6$ neurons): $-28.26 \pm 2.23$<br>Repetitive (R) ( $n = 14$ neurons): $-26.99 \pm 1.41$<br>Bursting (B) ( $n = 4$ neurons): $-35.22 \pm 1.72$ |              |                                    |      |                    |
| Supplementary<br>6<br>AP Half width<br>duration | One-way<br>ANOVA | $F_{(3, 29)} = 15.75$<br>$P < 0.0001$                                                                                                                                                                                       | Tukey's test | Single Spike (S)<br>Adaptive (A)   | ***  | $P_{adj} = 0.0003$ |
|                                                 |                  |                                                                                                                                                                                                                             |              | Single Spike (S)<br>Repetitive (R) | **** | $P_{adj} < 0.0001$ |
|                                                 |                  |                                                                                                                                                                                                                             |              | Single Spike (S)<br>Bursting (B)   | **** | $P_{adj} < 0.0001$ |
|                                                 |                  |                                                                                                                                                                                                                             |              | Adaptive (A)<br>Repetitive (R)     | ns   | $P_{adj} = 0.9959$ |
|                                                 |                  |                                                                                                                                                                                                                             |              | Adaptive (A)<br>Bursting (B)       | ns   | $P_{adj} = 0.5206$ |
|                                                 |                  |                                                                                                                                                                                                                             |              | Repetitive (R)<br>Bursting (B)     | ns   | $P_{adj} = 0.3096$ |
|                                                 | Descriptive      | Single Spike (S) ( $n = 9$ neurons): $0.52 \pm 0.03$<br>Adaptive (A) ( $n = 6$ neurons): $0.29 \pm 0.04$<br>Repetitive (R) ( $n = 14$ neurons): $0.3 \pm 0.02$                                                              |              |                                    |      |                    |

|                                       |               |                                                                                                                                                                                                                        |              |                                 |      |                    |
|---------------------------------------|---------------|------------------------------------------------------------------------------------------------------------------------------------------------------------------------------------------------------------------------|--------------|---------------------------------|------|--------------------|
|                                       |               | Bursting (B) ( $n = 4$ neurons): $0.21 \pm 0.02$                                                                                                                                                                       |              |                                 |      |                    |
| Supplementary 6<br>AP amplitude       | One-way ANOVA | $F_{(3, 29)} = 15.54$<br>$P < 0.0001$                                                                                                                                                                                  | Tukey's test | Single Spike (S) Adaptive (A)   | ***  | $P_{adj} = 0.0007$ |
|                                       |               |                                                                                                                                                                                                                        |              | Single Spike (S) Repetitive (R) | ***  | $P_{adj} = 0.0007$ |
|                                       |               |                                                                                                                                                                                                                        |              | Single Spike (S) Bursting (B)   | **** | $P_{adj} < 0.0001$ |
|                                       |               |                                                                                                                                                                                                                        |              | Adaptive (A) Repetitive (R)     | ns   | $P_{adj} = 0.8071$ |
|                                       |               |                                                                                                                                                                                                                        |              | Adaptive (A) Bursting (B)       | ns   | $P_{adj} = 0.1243$ |
|                                       |               |                                                                                                                                                                                                                        |              | Repetitive (R) Bursting (B)     | *    | $P_{adj} = 0.0107$ |
|                                       | Descriptive   | Single Spike (S) ( $n = 9$ neurons): $23.91 \pm 1.23$<br>Adaptive (A) ( $n = 6$ neurons): $36.49 \pm 2.85$<br>Repetitive (R) ( $n = 14$ neurons): $34.13 \pm 1.6$<br>Bursting (B) ( $n = 4$ neurons): $44.47 \pm 1.43$ |              |                                 |      |                    |
| Supplementary 6<br>SAG amplitude      | One-way ANOVA | $F_{(3, 29)} = 13.06$<br>$P < 0.0001$                                                                                                                                                                                  | Tukey's test | Single Spike (S) Adaptive (A)   | ns   | $P_{adj} = 0.1853$ |
|                                       |               |                                                                                                                                                                                                                        |              | Single Spike (S) Repetitive (R) | *    | $P_{adj} = 0.0137$ |
|                                       |               |                                                                                                                                                                                                                        |              | Single Spike (S) Bursting (B)   | **** | $P_{adj} < 0.0001$ |
|                                       |               |                                                                                                                                                                                                                        |              | Adaptive (A) Repetitive (R)     | ns   | $P_{adj} = 0.9220$ |
|                                       |               |                                                                                                                                                                                                                        |              | Adaptive (A) Bursting (B)       | **   | $P_{adj} = 0.0017$ |
|                                       |               |                                                                                                                                                                                                                        |              | Repetitive (R) Bursting (B)     | **   | $P_{adj} = 0.0016$ |
|                                       | Descriptive   | Single Spike (S) ( $n = 9$ neurons): $0.17 \pm 0.11$<br>Adaptive (A) ( $n = 6$ neurons): $1.48 \pm 0.33$<br>Repetitive (R) ( $n = 14$ neurons): $1.85 \pm 0.4$<br>Bursting (B) ( $n = 4$ neurons): $4.63 \pm 0.8$      |              |                                 |      |                    |
| Supplementary 6<br>Slow AHP amplitude | One-way ANOVA | $F_{(3, 29)} = 2.398$                                                                                                                                                                                                  |              |                                 | ns   | $P = 0.0883$       |
|                                       | Descriptive   | Single Spike (S) ( $n = 9$ neurons): $3.69 \pm 0.61$<br>Adaptive (A) ( $n = 6$ neurons): $2.27 \pm 0.37$<br>Repetitive (R) ( $n = 14$ neurons): $2.61 \pm 0.16$<br>Bursting (B) ( $n = 4$ neurons): $2.6 \pm 0.33$     |              |                                 |      |                    |
| Supplementary 6<br>Slow AHP duration  | One-way ANOVA | $F_{(3, 29)} = 6.90$<br>$P = 0.0012$                                                                                                                                                                                   | Tukey's test | Single Spike (S) Adaptive (A)   | ns   | $P_{adj} = 0.9976$ |
|                                       |               |                                                                                                                                                                                                                        |              | Single Spike (S) Repetitive (R) | **   | $P_{adj} = 0.002$  |
|                                       |               |                                                                                                                                                                                                                        |              | Single Spike (S) Bursting (B)   | ns   | $P_{adj} = 0.2516$ |
|                                       |               |                                                                                                                                                                                                                        |              | Adaptive (A) Repetitive (R)     | *    | $P_{adj} = 0.0124$ |
|                                       |               |                                                                                                                                                                                                                        |              | Adaptive (A) Bursting (B)       | ns   | $P_{adj} = 0.3872$ |
|                                       |               |                                                                                                                                                                                                                        |              | Repetitive (R) Bursting (B)     | ns   | $P_{adj} = 0.7408$ |
|                                       | Descriptive   | Single Spike (S) ( $n = 9$ neurons): $0.44 \pm 0.05$<br>Adaptive (A) ( $n = 6$ neurons): $0.47 \pm 0.06$<br>Repetitive (R) ( $n = 14$ neurons): $0.95 \pm 0.1$<br>Bursting (B) ( $n = 4$ neurons): $0.78 \pm 0.05$     |              |                                 |      |                    |

**Supplementary Table 2. Antibodies and Streptavidins Used<sup>1</sup>**

| Antigen                 | Host    | Source             | Code                         | Dilution   |
|-------------------------|---------|--------------------|------------------------------|------------|
| <b>Primary</b>          |         |                    |                              |            |
| α2B-ARs                 | Mouse   | Santa Cruz         | sc-390430                    | 1:100      |
| ChAT                    | Goat    | Millipore          | AB144P; RRID: AB_2079751     | 1:200      |
| GABA                    | Rabbit  | Sigma              | A2052; RRID: AB_477652       | 1:2000     |
| Gad1b                   | Rabbit  | GeneTex            | GTX124355; RRID: AB_11167690 | 1:50-1:100 |
| GFP                     | Chicken | Abcam              | AB13970; RRID: AB_300798     | 1:500      |
| HuC/D                   | Mouse   | Molecular Probes   | A-21271; RRID: AB_221448     | 1:500      |
| HuC/D                   | Rabbit  | GeneTex            | GTX128365; RRID: AB_2885764  | 1:400      |
| NeuN                    | Rabbit  | Cell Signaling     | #24307; RRID: AB_2651140     | 1:400      |
| TH                      | Mouse   | Millipore          | MAB318; RRID: AB_2201528     | 1:800      |
| Zn-12                   | Mouse   | DSHB               | RRID: AB_531908              | 1:100      |
| 5-HT                    | Rabbit  | Sigma              | S5545; RRID: AB_477522       | 1:2000     |
| <b>Secondary</b>        |         |                    |                              |            |
| Goat IgG-488            | Donkey  | ThermoFisher       | A-11055; RRID: AB_2534102    | 1:500      |
| Mouse IgG-647           | Donkey  | ThermoFisher       | A-31571; RRID: AB_162542     | 1:500      |
| Mouse IgG-568           | Donkey  | ThermoFisher       | A-10037; RRID: AB_2534013    | 1:500      |
| Mouse IgG-488           | Donkey  | ThermoFisher       | A-21202; RRID: AB_141607     | 1:500      |
| Rabbit IgG-488          | Donkey  | ThermoFisher       | A-21206; RRID: AB_2535792    | 1:500      |
| Rabbit IgG-647          | Donkey  | ThermoFisher       | A-31573; RRID: AB_2536183    | 1:500      |
| Rabbit IgG-568          | Donkey  | ThermoFisher       | A-10042; RRID: AB_2534017    | 1:500      |
| Mouse IgG-Biotinylated  | Horse   | VectorLaboratories | BA-2000; RRID: AB_2313581    | 1:200      |
| Rabbit IgG-Biotinylated | Horse   | VectorLaboratories | BA-1100; RRID: AB_2336201    | 1:200      |
| <b>Streptavidin</b>     |         |                    |                              |            |
| Alexa Fluor 488         |         | ThermoFisher       | S32354; RRID: AB_2315383     | 1:500      |
| Alexa Fluor 555         |         | ThermoFisher       | S32355; RRID: AB_2571525     | 1:500      |
| Alexa Fluor 647         |         | ThermoFisher       | S32357; RRID: AB_2336066     | 1:500      |

<sup>1</sup>5-HT, 5-hydroxytryptamine (Serotonin); α2B-ARs, alpha2B-adrenergic receptors; ChAT, choline-acetyltransferase; GABA, γ-aminobutyric acid; Gad1, Glutamate Decarboxylase 1; GFP, green fluorescent protein; HuC/D, Elav3+4; NeuN, Neuronal protein Fox-3/RBFOX3; TH, tyrosine hydroxylase; Zn-12, neuronal cell surface marker (HNK-1 carbohydrate epitope).
